# Supplementary material
Source: PubMed Central journal article supplement (PMC2878666)
Supplement: NIHMS202539-supplement-1_si_001.pdf [file NIHMS202539-supplement-1_si_001.pdf]

# Supplemental Material

For the Biochemistry article entitled:

## **[<sup>3</sup>H]Chlorpromazine Photolabeling of the *Torpedo* Nicotinic Acetylcholine Receptor Identifies Two State-Dependent Binding Sites in the Ion Channel**

by David C. Chiara, Ayman K. Hamouda, Michael R. Ziebell, Luis A. Mejia, Galo Garcia III, and  
Jonathan B. Cohen

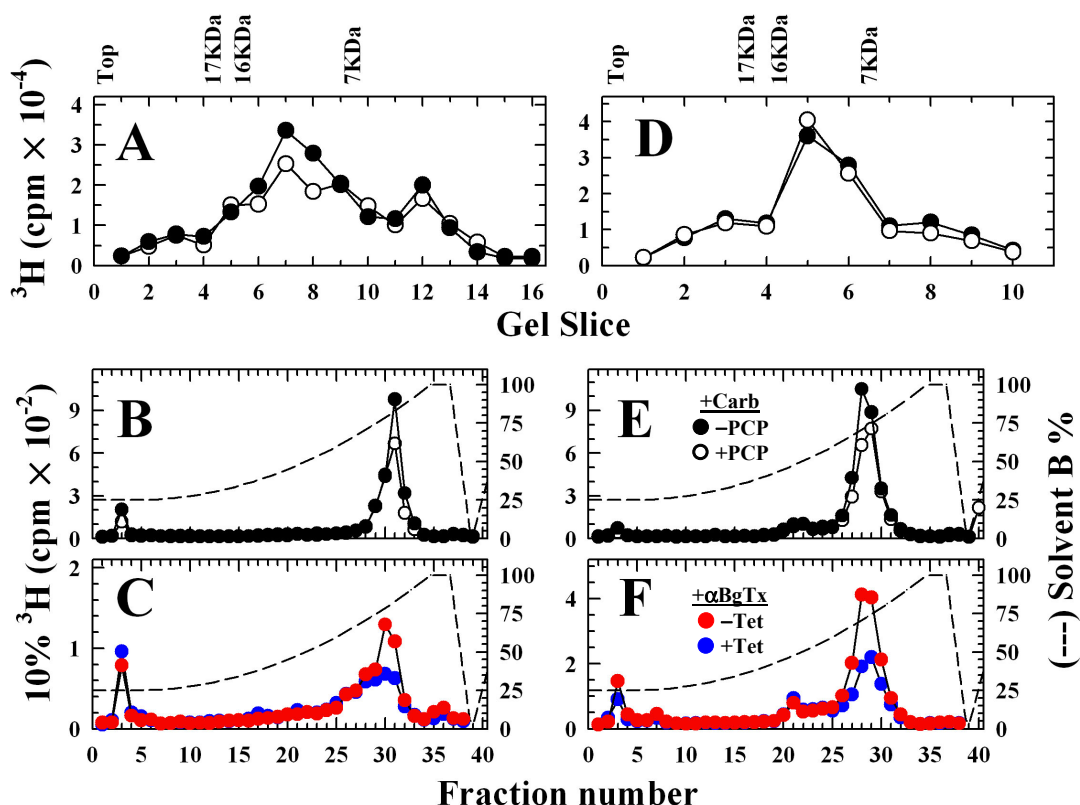

**Supplemental Figure S1. Isolation of [ $^3\text{H}$ ]CPZ-labeled fragments beginning at the N-termini of  $\beta\text{M2}$  and  $\delta\text{M2}$ .**  $\beta$  and  $\delta$  subunits were isolated from nAChRs photolabeled with [ $^3\text{H}$ ]CPZ +Carb with (○) or without 100  $\mu\text{M}$  PCP (●) (A, B, D, and E) or + $\alpha$ -BgTx with (●) or without 100  $\mu\text{M}$  tetracaine (●) (C and F), digested with trypsin ( $\beta$ ) or EndoLys-C ( $\delta$ ), and fractionated by Tricine SDS-PAGE (+Carb, A and D; + $\alpha$ BgTx, not shown). A,  $^3\text{H}$  elution profile of the Tricine gel fractionation of the trypsin digests of the  $\beta$  subunit (+Carb,  $\pm$ PCP). B,  $^3\text{H}$  elution profile for the rpHPLC purification of material eluted from the major radioactive gel band, which migrated with an apparent molecular mass of 10 kDa (gel slice 7; -PCP, 28,200 cpm; +PCP, 23,600 cpm). Sequence analyses of the  $^3\text{H}$  peak (rpHPLC fractions 31-32; -PCP, 12,700 cpm; +PCP, 8,200 cpm) are shown in **Figure 5A**. The corresponding rpHPLC fractions from gel slice 8 contained fragments beginning at  $\beta\text{Met-249}$  (15 pmol),  $\beta\text{Lys-216}$  and  $\beta\text{Asp-427}$ , each at 2-4 pmol. For gel slice 9, the fragments began at  $\beta\text{Asp-427}$  (~8 pmol),  $\beta\text{Met-249}$  and  $\beta\text{Lys-216}$  (each ~4 pmol). C,  $^3\text{H}$  elution profile for the rpHPLC purification of material eluted from the major radioactive band, which migrated with ~10 kDa (-tetracaine, 7,000 cpm; +tetracaine, 6,830 cpm). Sequence analyses of the  $^3\text{H}$  peak (rpHPLC fractions 30-31; -tetracaine, 1,925 cpm; +tetracaine, 960 cpm) are shown in **Figure 7B**. D,  $^3\text{H}$  elution profile of the Tricine gel fractionation of the EndoLys-C digests of the  $\delta$  subunit (+Carb,  $\pm$ PCP). E,  $^3\text{H}$  elution profile for the rpHPLC purification of material eluted from the major radioactive gel band, which migrated with an apparent molecular mass of 14 kDa (gel slice 5; -PCP, 35,500 cpm; +PCP, 31,300 cpm). Sequence analyses of rpHPLC fractions 27-30 (-PCP, 26,000 cpm; +PCP, 19,900 cpm) are shown in **Figure 5B**. Fractions 24-26 contained the fragment beginning at  $\delta\text{Phe-216}$  (14 pmol). Fractions 28-30 from gel band 6 contained fragments beginning at  $\delta\text{Met-257}$  and  $\delta\text{Asn-437}$  (20 pmol each). F,  $^3\text{H}$  elution profile for the rpHPLC purification of material eluted from the major radioactive band, which migrated at ~14 kDa (-tetracaine, 14,300 cpm; +tetracaine, 9,840 cpm). Sequence analyses of  $^3\text{H}$  peak (rpHPLC fractions 27-30; -tetracaine, 10,640 cpm; +tetracaine, 5,460 cpm) are shown in **Figure 7C**.

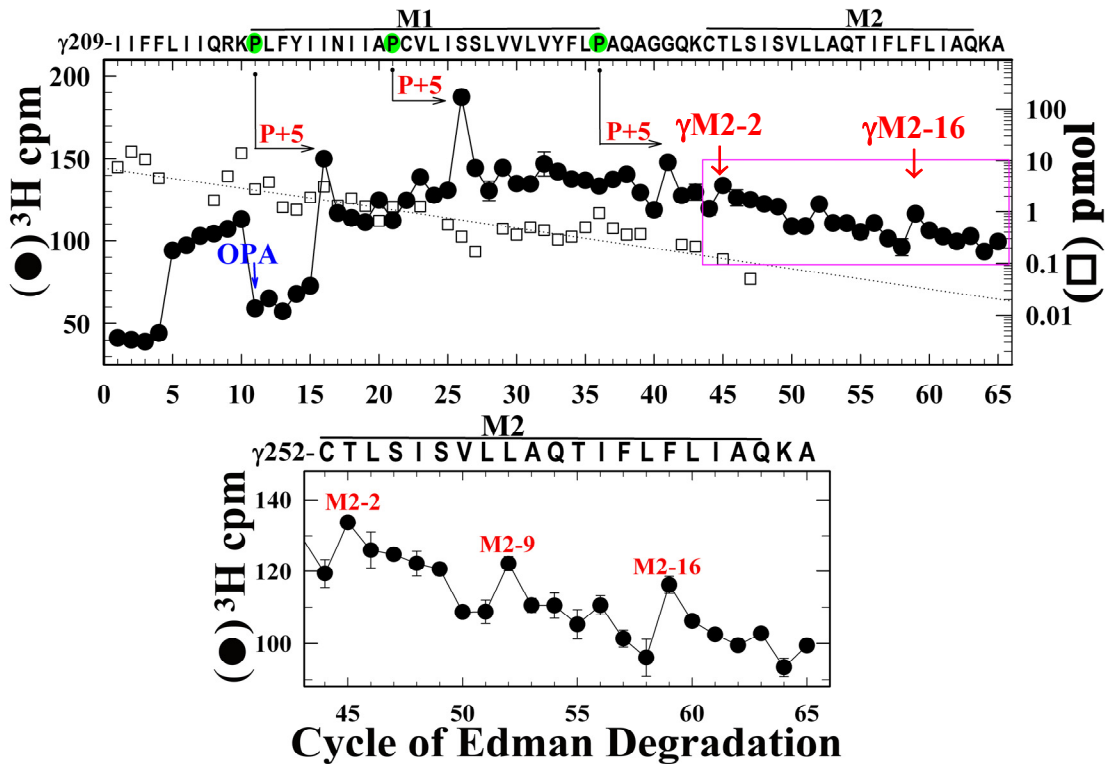

**Supplemental Figure S2. Sequence analysis of [ $^3\text{H}$ ]CPZ-labeled  $\gamma\text{M1-M2}$  illustrates an acid-labile Q-T peptide bond four residues before the labeled  $\gamma\text{Phe-267}$  (M2-16) within  $\gamma\text{M2}$ .**  $\gamma$  Subunit was isolated from nAChRs photolabeled with [ $^3\text{H}$ ]CPZ (+Carb), digested with V8 protease in solution, and fractionated by rpHPLC. The  $^3\text{H}$  eluted as a single broad peak centered at  $\sim 80\%$  organic (90,700 cpm). Half of that material was sequenced for 65 cycles of Edman degradation, using liquid trifluoroacetic acid in each cleavage step, and the sequencing filter was treated with *o*-phthalaldehyde prior to cycle 11 to chemically isolate the peptide extending through  $\gamma\text{M1}$  and  $\gamma\text{M2}$  that contained  $\gamma\text{Pro-219}$  at that cycle. The only sequence remaining after this treatment originally began at  $\gamma\text{Ile-209}$  ( $\square$ ,  $I_0 = 7.5$  pmol,  $R = 91\%$ ). At each cycle containing a proline, the sequencer was programmed to increase the duration of exposure to acid for the cleavage step from 5 to 6 min and the temperature was increased from 48 to 53  $^\circ\text{C}$ , because the proline bond is relatively refractory to acid cleavage. The  $^3\text{H}$  release pattern ( $\bullet$ ) contained an unusual sudden background increase in cycle 5, reduced upon *o*-phthalaldehyde treatment, and peaks of  $^3\text{H}$  release in cycles 16, 21, and 41, each occurring 5 cycles after cleaving at a proline. While sequencing through  $\gamma\text{M2}$ , there were minor peaks of  $^3\text{H}$  release in cycle 59 (20 cpm), consistent with labeling of  $\gamma\text{Phe-267}$  ( $\gamma\text{M2-16}$ ), and in cycles 46 and 52, consistent with labeling of  $\gamma\text{M2-2}$  and  $\gamma\text{M2-9}$ . The levels of released PTH-amino acids could be quantified only for the first 45 cycles of Edman degradation, but based upon the observed initial and repetitive yields, the calculated mass level of  $\gamma\text{Phe-267}$  indicates labeling at that position at  $\sim 100$  cpm/pmol, and labeling at  $\gamma\text{Thr-253}$  at  $\sim 20$  cpm/pmol. As treatment with liquid trifluoroacetic acid produces preferential cleavage N-terminal of Ser or Thr and C-terminal of Asp or Asn (Hulmes and Pan, *Anal. Biochem.* 197: 368-376 (1991); Lin et al., *Proteomics* 1: 1172-1184 (2001)), the increase of background  $^3\text{H}$  release in cycle 5, 5 cycles after the acid pretreatment of the sample before sequencing, and the peaks of  $^3\text{H}$  release in cycles 16, 21, and 41, each 5 cycles after the prolonged exposure to acid at the proline cycles, can all be explained by the enhanced acid-lability and selective cleavage of the  $\gamma\text{Gln-262}/\gamma\text{Thr-263}$  bond 5 cycles before [ $^3\text{H}$ ]CPZ-photolabeled  $\gamma\text{Phe-267}$ . In separate experiments, we confirmed that for samples containing [ $^3\text{H}$ ]CPZ-photolabeled  $\gamma\text{M2}$ , increased acid exposure at any cycle of Edman degradation resulted in a peak of  $^3\text{H}$  release 5 cycles later, and that for samples containing  $\gamma\text{M2}$  with [ $^{125}\text{I}$ ]TID photoincorporated at  $\gamma\text{Ile-264}$  (White and Cohen, *J. Biol. Chem.* 267: 15770-15783 (1982)), increased exposure to acid resulted in  $^{125}\text{I}$  release 2 cycles later (data not shown).

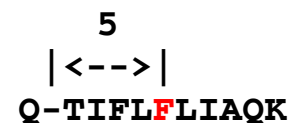

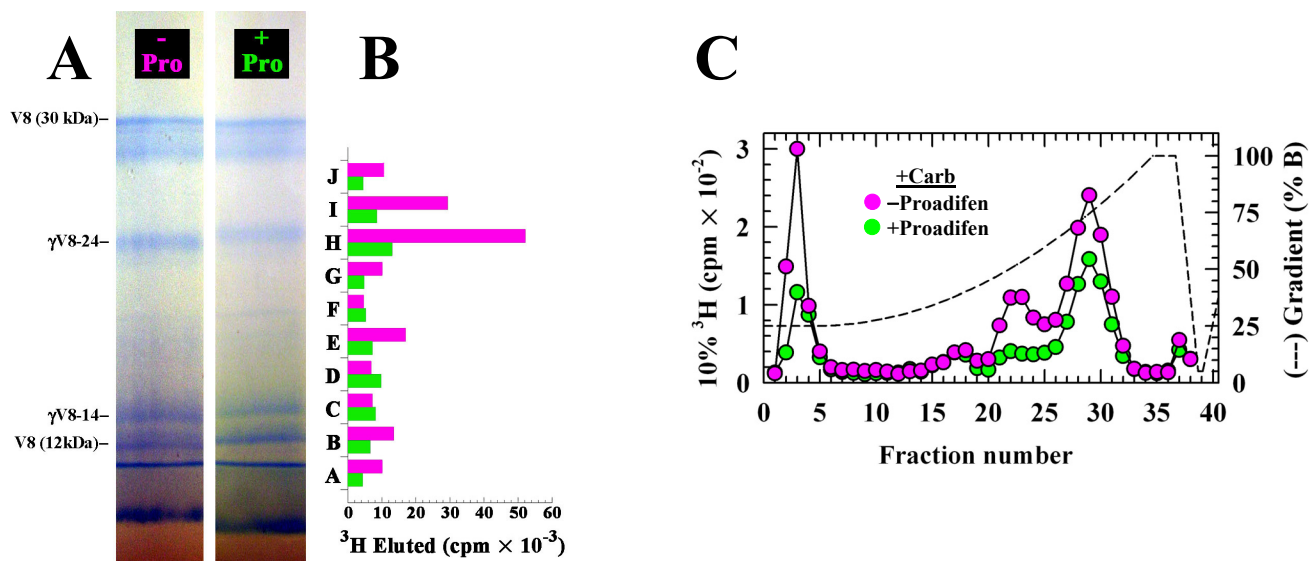

**Supplemental Figure S3. Isolation of [ $^3\text{H}$ ]CPZ labeled  $\gamma\text{M2}$  by “in gel” digestion with V8 protease, trypsin digestion, and reversed-phase HPLC.** nAChR-rich membranes were photolabeled with [ $^3\text{H}$ ]CPZ in the presence of 1 mM Carb with (●) or without 100  $\mu\text{M}$  proadifen (●) and separated by SDS-PAGE. Gel bands containing  $\gamma$  subunit were placed onto a second gel and digested “in gel” with V8 protease as described in “Experimental Procedures”. **A**, Coomassie blue stain of the mapping gel. **B**, Distribution of  $^3\text{H}$  eluted from 1 cm strips of the gel. Material eluted from gel bands H and I ( $\gamma\text{V8-24}$ , -proadifen, 95,200 cpm; +proadifen, 20,400 cpm) were pooled, filtered, concentrated, and acetone precipitated. Sequence analysis of an aliquot of  $\gamma\text{V8-24}$  confirmed that it began at  $\gamma\text{Ala-167}$ , the N-terminus of  $\gamma\text{V8-24}$  (Blanton and Cohen, *Biochemistry* 33: 2859-2872 (1994)). **C**, rpHPLC fractionation of trypsin digests of  $\gamma\text{V8-24}$  (-proadifen, ●, 4,820 cpm injected, 1,400 recovered; +proadifen, ●, 1,080 cpm injected, 1,220 cpm recovered). Fractions 22-23 were pooled for sequencing (**Figure 6D**). Sequence analysis of the pool of fractions 27-29 revealed a primary sequence beginning at the N termini of  $\gamma\text{M1}$  ( $\gamma\text{Lys-218}$ ,  $\sim 0.4$  pmol) at 3-5 times the level of the  $\gamma\text{M2}$  fragment ( $\gamma\text{Cys-252}$ ). Fractions 30-32 contained the same fragments.

The presence of  $\gamma\text{M2}$  in fractions 22-23 is consistent with the predicted hydrophobicity of the fragment beginning at  $\gamma\text{Cys-252}$  and ending at either  $\gamma\text{Lys-272}$  or  $\gamma\text{Lys-285}$  before  $\gamma\text{M3}$ , as illustrated below:

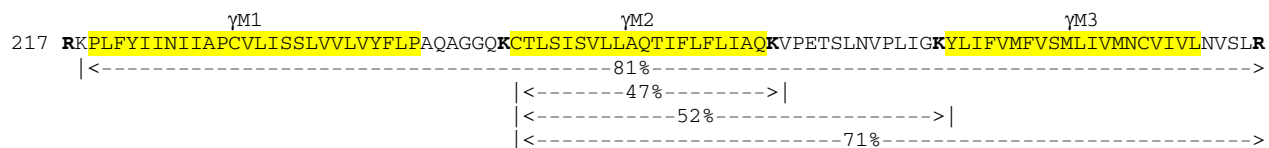

Percentages listed denote predicted organic concentration to elute the denoted peptide, calculated using peptides of known retention times on our rpHPLC system and the peptide retention prediction programs of Kangas (Petritis, K. *et al.* *Analytical Chemistry*, 78:5026-5039 (2006)) and Krokhin (Krokhin, O.V. *et al.* *Molecular Cell Proteomics*, 3: 909-919 (2004)) as employed in the Normalized Elution Time (NET) Prediction Utility from the Pacific Northwest National Laboratory. Possible trypsin cleavage sites in bold.

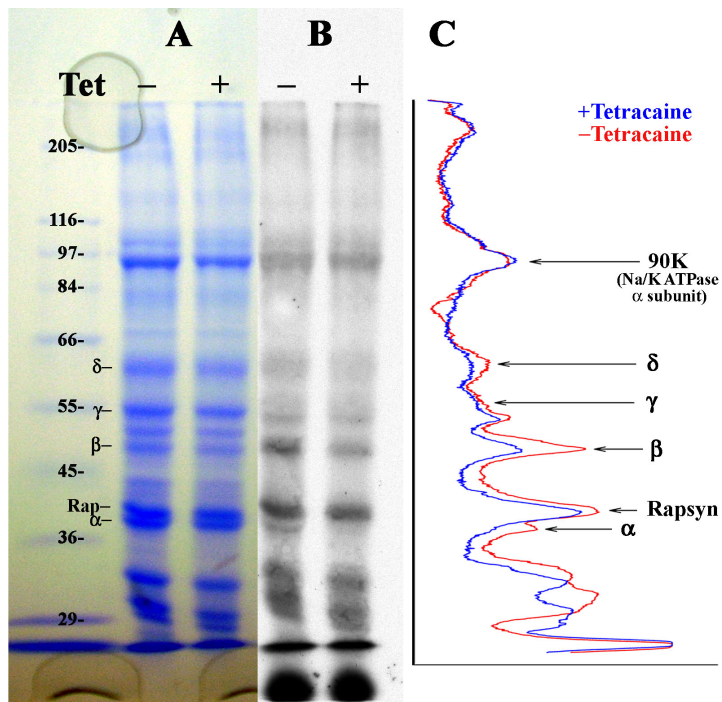

**Supplemental Figure S4.** For nAChRs equilibrated with  $\alpha$ BgTx, there is tetracaine inhibitable [ $^3$ H]CPZ photoincorporation in the nAChR  $\alpha$ ,  $\beta$ , and  $\delta$  subunits, with little if any photoincorporation in the  $\gamma$  subunit. nAChR-rich membranes were photolabeled on a preparative scale with [ $^3$ H]CPZ in the presence of 10  $\mu$ M  $\alpha$ BgTx with or without 100  $\mu$ M tetracaine, and aliquots (100  $\mu$ g) were separated by SDS-PAGE. **A**, Coomassie blue stain of the gel. **B**, Fluorogram, after exposure to film for 2 weeks at -80  $^{\circ}$ C. **C**, Densitometry scans of the fluorogram lanes, quantified using ImageQuant software (Molecular Dynamics). [ $^3$ H]CPZ was photoincorporated at greater efficiency into rapsyn than in the nAChR  $\alpha$  subunit, but only the photolabeling in the  $\alpha$ ,  $\beta$ , and  $\delta$  subunits was inhibitable by tetracaine. The mobilities of the molecular weight standards are indicated on the left (A), as are the positions of the nAChR subunits and rapsyn (Rap). The sequencing data characterizing [ $^3$ H]CPZ photoincorporation in  $\alpha$ M2,  $\beta$ M2, and  $\delta$ M2 are shown in **Figure 7**.

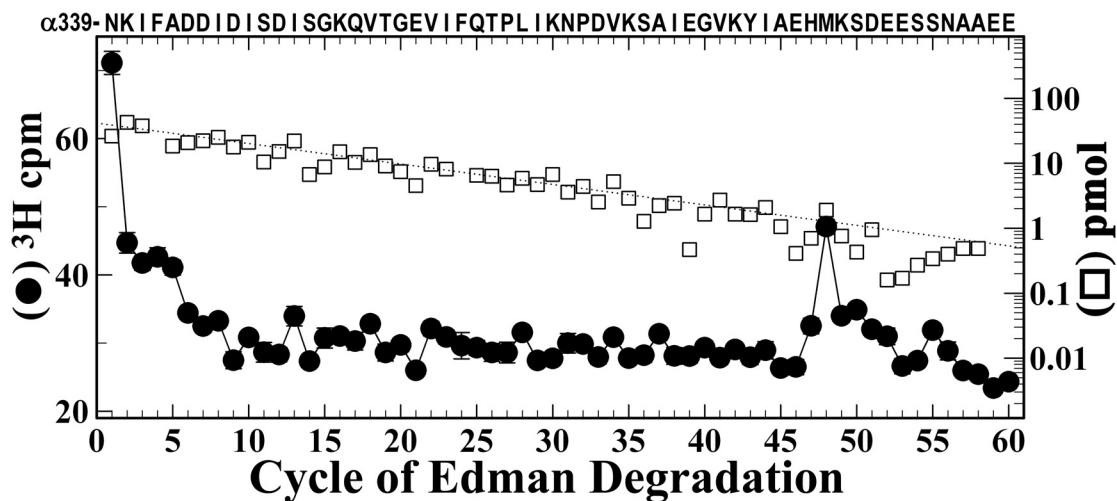

**Supplemental Figure S5. [<sup>3</sup>H]CPZ photolabeling in the  $\alpha$  subunit cytoplasmic (MA) helix.** An additional preparative photolabeling of nAChRs (+Carb) was carried out to further characterize the amino acids photolabeled within the  $\alpha$ MA helix.  $\alpha$  Subunit was subjected to in-gel digestion with V8 protease. A broad gel band of ~10 kDa was excised, and the polypeptides were eluted and then directly fractionated by rpHPLC. The <sup>3</sup>H elution profile was similar to that in Figure 8A (closed circles), and fractions 28-32 were pooled and sequenced, with <sup>3</sup>H (●) and PTH-amino acids (□) release determined for 60 cycles of Edman degradation. The primary sequence detected began at  $\alpha$ Asn-339 ( $I_0 = 42 \pm 3$  pmol,  $R = 93$  %; ~10,000 cpm loaded; 1,700 cpm remained on the filter after 60 cycles). The peaks of <sup>3</sup>H release in cycles 48 and 55 indicate [<sup>3</sup>H]CPZ photolabeling of  $\alpha$ Met-386 (2.3 cpm/pmol) and  $\alpha$ Ser-393 (1.2 cpm/pmol), respectively.



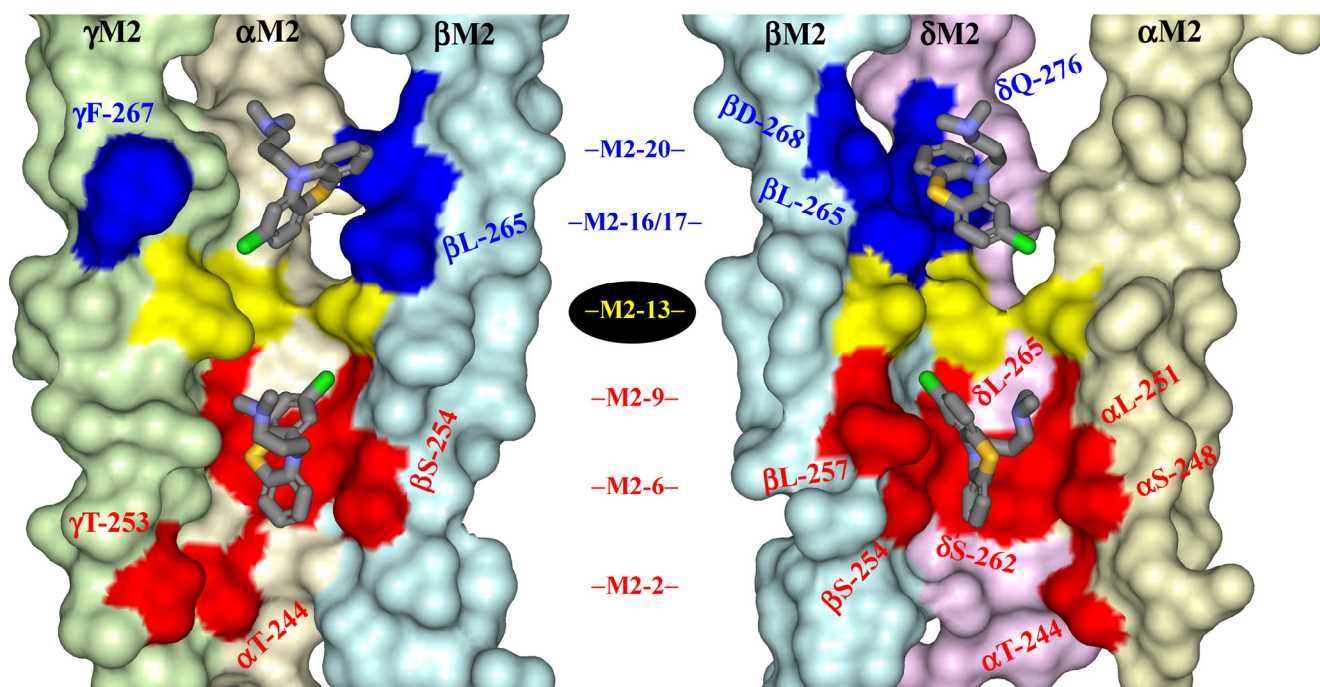

**Supplemental Figure S6. Two binding sites for CPZ within the nAChR ion channel in the desensitized state.**

Shown are Connolly surface representations of three of the five M2 helices (left panel:  $\gamma$  light green;  $\alpha_\gamma$ , light yellow; and  $\beta$ , light blue. right panel:  $\beta$ , light blue;  $\delta$ , light magenta; and  $\alpha_\delta$ , light yellow) with the residues labeled by [ $^3\text{H}$ ]CPZ at the bottom or top of the channel colored red or blue, respectively. Yellow denotes the M2-13 residues, which are not labeled by CPZ illustrating the separation between the two sites. Included in stick format are the lowest energy solutions for CPZ (carbon, gray; nitrogen, blue; sulfur, yellow; and chlorine, green) docked to each of the sites (see Experimental Procedures).
